# Supplementary material for: Highly sensitive label-free biomolecular detection using Au–WS2 nanohybrid based SERS substrates
Source: Royal Society of Chemistry journal article supplement (doi:10.1039/d4na00464g), 2024-01-01
Supplement: d4na00464g1.pdf [file d4na00464g1.pdf]

## Supporting Information

Om Prakash<sup>1#</sup>, Abhijith T<sup>2,3#</sup>, Priya Nagpal<sup>4</sup>, Vivekanandan Perumal<sup>4</sup>, Supravat Karak<sup>2</sup>, Udai B. Singh<sup>5</sup>, Santanu Ghosh<sup>1\*</sup>

<sup>1</sup>*Nanotech Laboratory, Department of Physics, Indian Institute of Technology Delhi, New Delhi 110016, India.*

<sup>2</sup>*Organic and Hybrid Electronic Device Laboratory, Department of Energy Science and Engineering, Indian Institute of Technology Delhi, New Delhi 110016, India.*

<sup>3</sup>*Department of Nanoscience and Technology, PSG Institute of Advanced Studies, Peelamedu, Coimbatore, Tamil Nadu 641004, India.*

<sup>4</sup>*Kusuma School of Biological Sciences, Indian Institute of Technology Delhi, New Delhi 110016, India.*

<sup>5</sup>*Department of Physics, Deen Dayal Upadhyay Gorakhpur University, Gorakhpur, 273009, India.*

\* Corresponding author email: [santanu1@physics.iitd.ac.in](mailto:santanu1@physics.iitd.ac.in)

# Om Prakash and Abhijith T equally contributed to this work

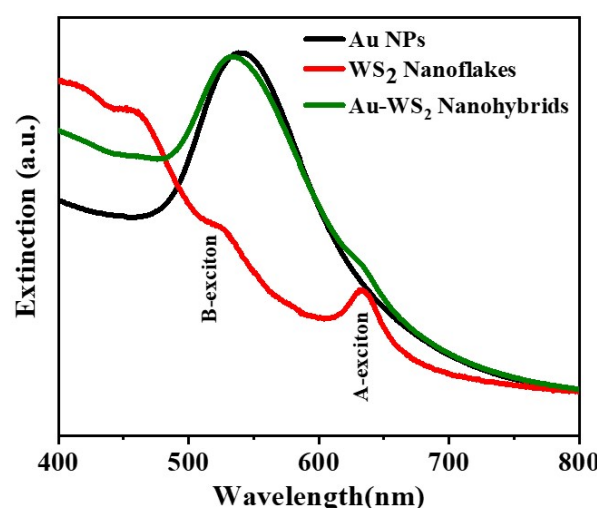

**Figure S1.** The extinction spectra of Au NPs, WS<sub>2</sub> nanoflakes and Au-WS<sub>2</sub> nanohybrids.

## Enhancement factor calculation

The EF was calculated for all Raman modes of  $10^{-9}$  M R6G concentration.  $I_{SERS}$  was taken as the intensity value of the SERS signal for mentioned Raman mode when 2  $\mu$ L of  $10^{-6}$  M R6G concentration drop casted on optimized SERS-active substrate.

$$EF = \frac{I_{SERS} \times N_{RAMAN}}{I_{RAMAN} \times N_{SERS}} \quad (1)$$

$$EF = \frac{I_{SERS} \times h\rho\pi r^2}{I_{RAMAN} \times McV} \quad (2)$$

$$h = \frac{2\lambda}{(N.A.)^2} \quad (3)$$

M and  $\rho$  of R6G are 479.02 g/mol and 1.26 g/cm<sup>3</sup> respectively. h is the depth of laser penetration and N.A. is the numerical aperture of the objective lens. enhancement factor calculations corresponding to the 1512 cm<sup>-1</sup> peak is shown below. All the parameters are given in the main draft. The EF calculations correspond to all the peaks shown in Table 1 in the main draft.

$$h = \frac{2 \times 785 \text{ nm}}{(0.5)^2} = 6.28 \mu\text{m}$$

$$EF = \frac{\frac{9043}{20 \text{ mW} \times 20 \text{ s} \times 3} \times 6.28 \mu\text{m} \times 1.26 \frac{\text{g}}{\text{cm}^3} \times \pi \times 2^2 \text{ mm}^2}{\frac{50}{20 \text{ mW} \times 20 \text{ s} \times 3} \times 479.02 \frac{\text{g}}{\text{mol}} \times 10^{-9} \frac{\text{mol}}{\text{L}} \times 2 \mu\text{L}}$$

$$EF = 1.80 \times 10^9$$

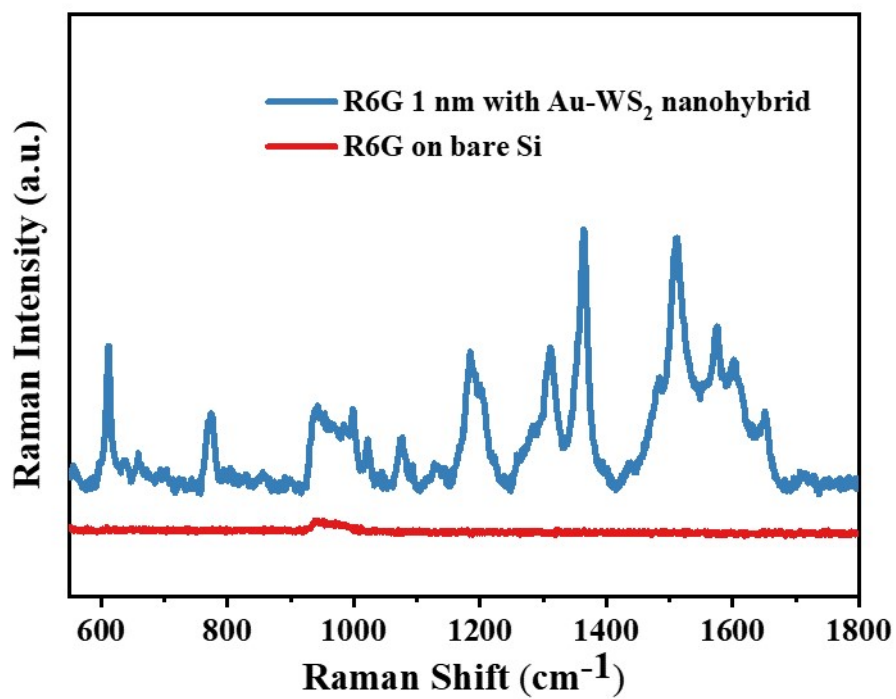

*Figure S2. Raman Spectra of R6G on bare Si substrate and with Au-WS<sub>2</sub> nanohybrid.*
